# Supplementary material
Source: PubMed Central journal article supplement (PMC4018157)
Supplement: mp5000373_si_001.pdf [file mp5000373_si_001.pdf]

## SUPPLEMENTARY INFORMATION

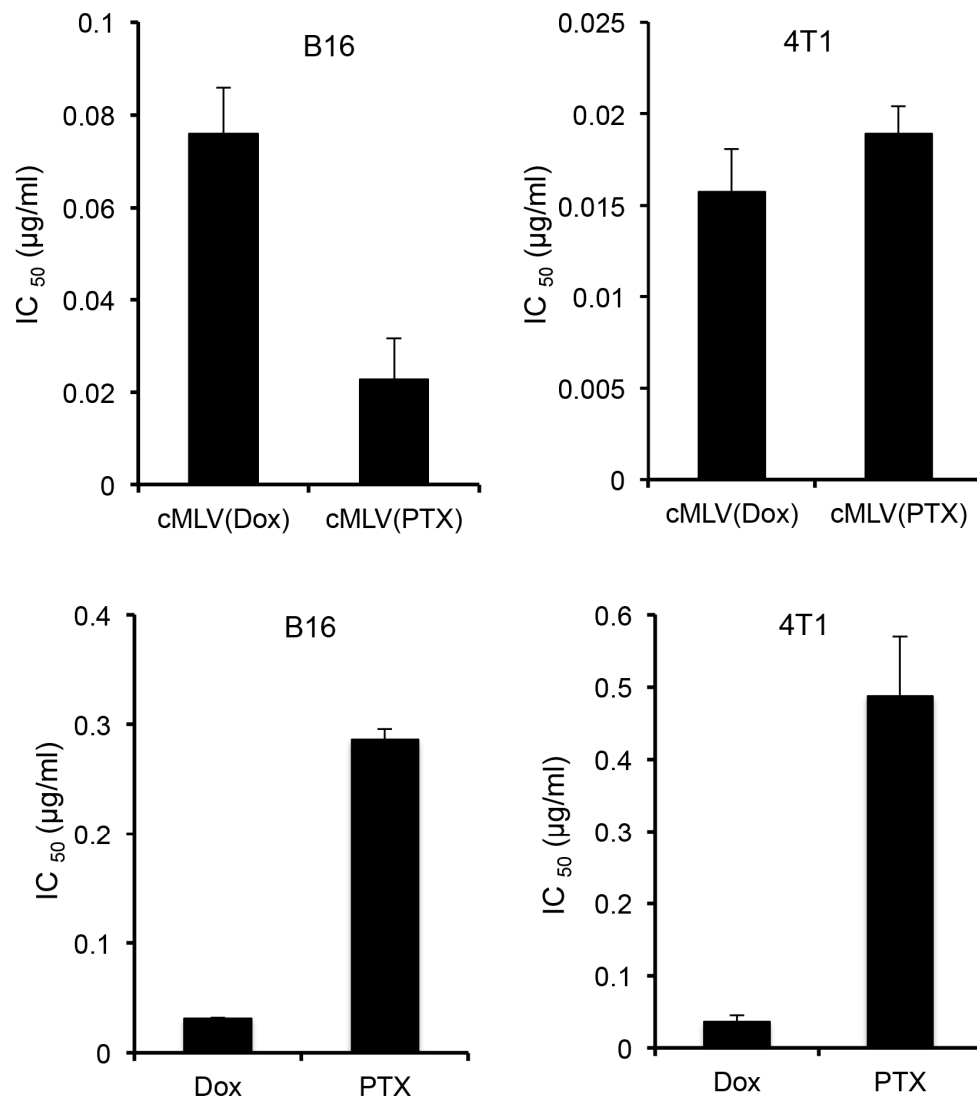

**Figure S1.** IC<sub>50</sub> values of Dox and PTX in cMLV formulation or free drug solution in B16 melanoma or 4T1 breast tumor cells.

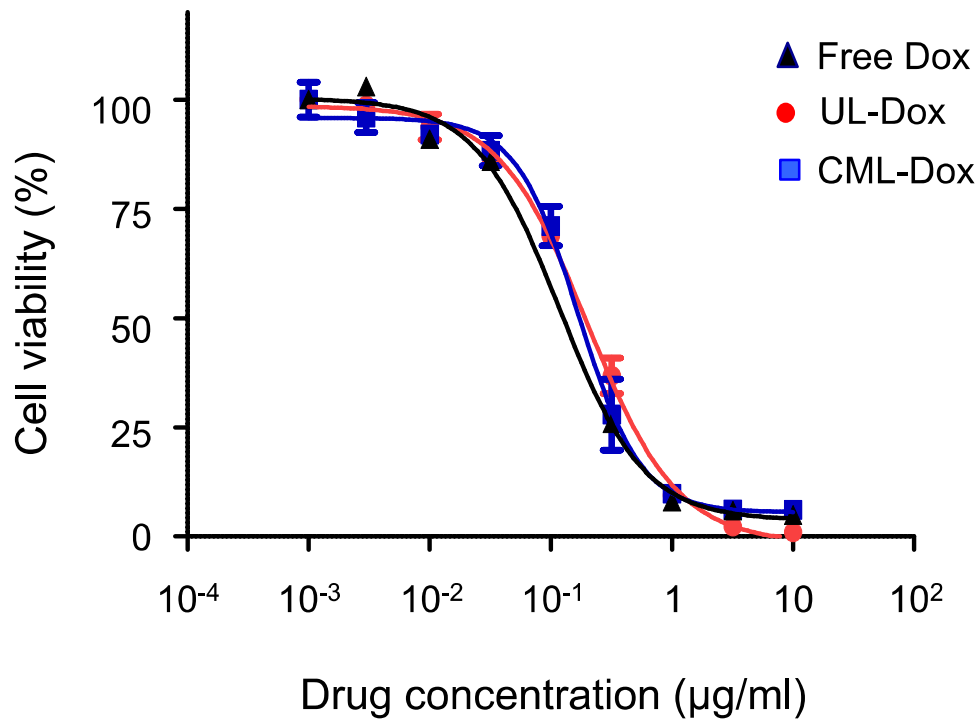

**Figure S2.** *In vitro* cytotoxicity of free Dox, UL-Dox, and CML-Dox in HeLa cells. The cytotoxicity was measured by a standard XTT assay. Error bars represent the standard deviation

of the mean from triplicate experiments.
